# Supplementary material for: Synthesis, characterization and magnetic properties of halogenated tetranuclear cubane-like nickel(ii) complexes
Source: Royal Society of Chemistry journal article supplement (doi:10.1039/d3nj05585j), 2024-01-01
Supplement: d3nj05585j1.pdf [file d3nj05585j1.pdf]

## SUPPORTING INFORMATION

# Synthesis, characterization and magnetic properties of halogenated tetranuclear cubane-like nickel(II) complexes

Mahnaz Aryaeifar<sup>a</sup>, Hadi Amiri Rudbari<sup>a,\*</sup>, Eufemio Moreno-Pineda<sup>b,c</sup>, José V. Cuevas-Vicario<sup>d</sup>, Sagar Paul<sup>e</sup>, Michael Schulze<sup>e</sup>, Wolfgang Wernsdorfer<sup>e,f,g,\*</sup>, Francisco Lloret<sup>h</sup>, Nakisa Moini<sup>i</sup>, Olivier Blacque<sup>j</sup>

<sup>a</sup> Department of Chemistry, University of Isfahan, Isfahan 81746-73441, Iran.

<sup>b</sup> Depto. de Química-Física, Facultad de Ciencias Naturales, Exactas y Tecnología, Universidad de Panamá, Panamá.

<sup>c</sup> Grupo de Investigación de Materiales, Facultad de Ciencias Naturales, Exactas y Tecnología, Universidad de Panamá.

<sup>d</sup> Departamento de Química, Universidad de Burgos, Pza. Misael Bañuelos S/N, Burgos, Spain

<sup>e</sup> Physikalisches Institut, Karlsruhe Institute of Technology, D-76131 Karlsruhe, Germany.

<sup>f</sup> Institute for Quantum Materials and Technology (IQMT), Karlsruhe Institute of Technology (KIT), Hermann-von-Helmholtz-Platz 1, D-76344 Eggenstein-Leopoldshafen, Germany.

<sup>g</sup> Institute for Quantum Materials and Technology (IQMT), Karlsruhe Institute of Technology (KIT), Hermann-von-Helmholtz-Platz 1, D-76344 Eggenstein-Leopoldshafen, Germany.

<sup>h</sup> Departament de Química Inorganica/Instituto de Ciencia Molecular (ICMol), Universitat de Valencia, C/ Catedrático José Beltrán 2, 46980 Paterna, València, Spain.

<sup>i</sup> Department of Chemistry, Faculty of Physics and Chemistry Alzahra University, P.O. Box 1993891176, Vanak Tehran, Iran.

<sup>j</sup> Department of Chemistry, University of Zurich, Winterthurerstrasse 190, CH-8057, Zurich, Switzerland.

**\*Corresponding authors:** [h.a.rudbari@sci.ui.ac.ir](mailto:h.a.rudbari@sci.ui.ac.ir), [hamiri1358@gmail.com](mailto:hamiri1358@gmail.com) (H. Amiri Rudbari); [wolfgang.wernsdorfer@kit.edu](mailto:wolfgang.wernsdorfer@kit.edu) (W. Wernsdorfer)

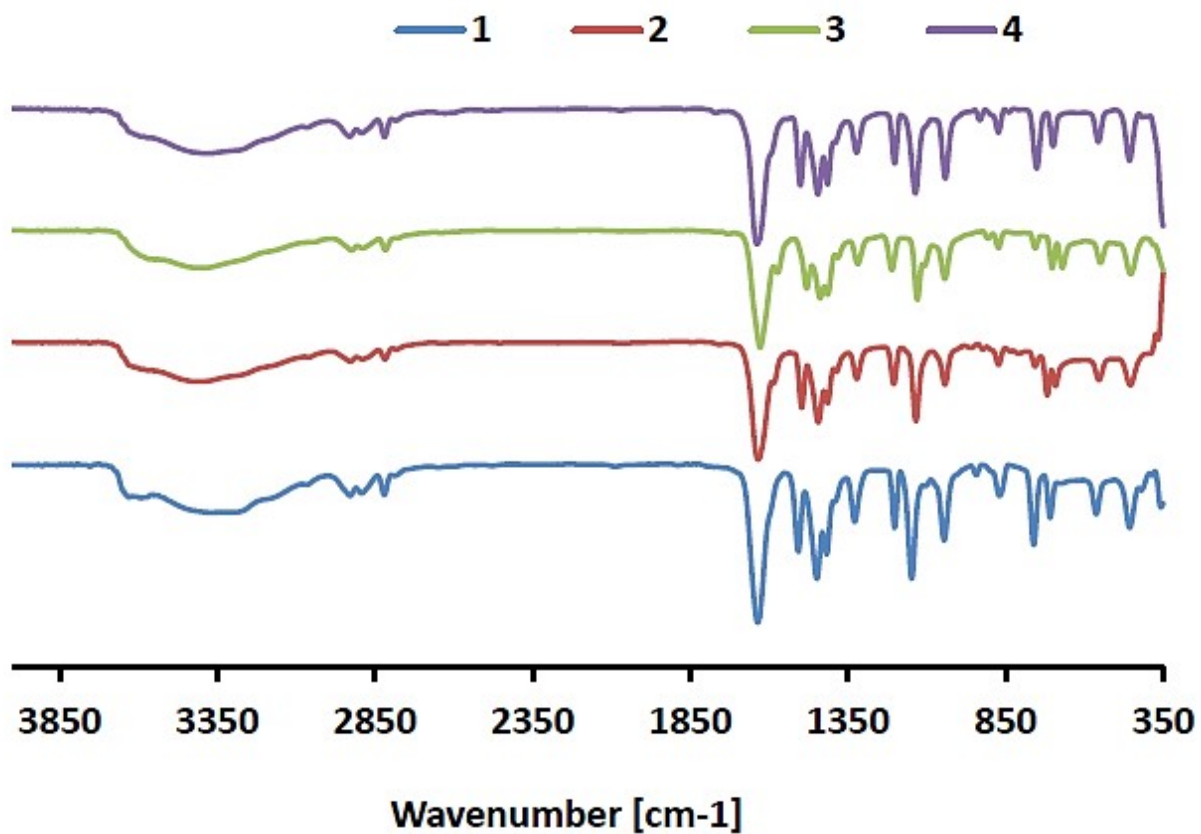

**Figure S1.** FT-IR spectra of **1**, **2**, **3** and **4** complexes.

**Table S1.** Crystal data and structure refinement for **4**.

---

|                                                  |                                                                                                 |
|--------------------------------------------------|-------------------------------------------------------------------------------------------------|
| Empirical formula                                | C <sub>36</sub> H <sub>40</sub> Br <sub>4</sub> Cl <sub>4</sub> Ni <sub>4</sub> O <sub>16</sub> |
| Formula weight                                   | 1424.96                                                                                         |
| Temperature (K)                                  | 302(2)                                                                                          |
| Wavelength (Å)                                   | 0.71073                                                                                         |
| Crystal system                                   | Monoclinic                                                                                      |
| Space group                                      | P2 <sub>1</sub> /c                                                                              |
| Unit cell dimensions (Å, °)                      | a = 17.1504(12)<br>b = 18.4070(14)<br>c = 15.3957(12)<br>β = 90.952(3)                          |
| Volume (Å <sup>3</sup> )                         | 4859.6(6)                                                                                       |
| Z                                                | 4                                                                                               |
| Calculated density (Mg/m <sup>3</sup> )          | 1.948                                                                                           |
| Absorption coefficient (mm <sup>-1</sup> )       | 5.099                                                                                           |
| F(000)                                           | 2816                                                                                            |
| Theta range for data collection (°)              | 2.848 to 24.999                                                                                 |
| Index ranges                                     | -20 ≤ h ≤ 20<br>-21 ≤ k ≤ 21<br>-18 ≤ l ≤ 18                                                    |
| Reflections collected                            | 93557                                                                                           |
| Independent reflections                          | 8553 [R <sub>(int)</sub> = 0.1217]                                                              |
| Data Completeness (%)                            | 99.9                                                                                            |
| Refinement method                                | Full-matrix least-squares on F <sup>2</sup>                                                     |
| Data / restraints / parameters                   | 8553 / 10 / 598                                                                                 |
| Goodness-of-fit on F <sup>2</sup>                | 1.093                                                                                           |
| Final R indices [I > 2σ (I)]                     | R <sub>1</sub> = 0.0628<br>wR <sub>2</sub> = 0.1064                                             |
| R indices (all data)                             | R <sub>1</sub> = 0.1160<br>wR <sub>2</sub> = 0.1339                                             |
| Largest diff. peak and hole (e.Å <sup>-3</sup> ) | 0.810 and -0.956                                                                                |
| CCDC number                                      | 2311186                                                                                         |

---

**Table S2.** Selected bond lengths (Å) and angles (°) for **4**.

|             |            |                   |           |
|-------------|------------|-------------------|-----------|
| Ni(1)-O(1)  | 1.991(5)   | O(10)-Ni(1)-O(9)  | 83.4(2)   |
| Ni(1)-O(10) | 2.030(5)   | O(10)-Ni(1)-O(11) | 82.2(2)   |
| Ni(1)-O(2)  | 2.041(6)   | O(9)-Ni(1)-O(11)  | 82.7(2)   |
| Ni(1)-O(9)  | 2.049(5)   | O(11)-Ni(2)-O(12) | 83.7(2)   |
| Ni(1)-O(11) | 2.059(5)   | O(11)-Ni(2)-O(10) | 82.3(2)   |
| Ni(1)-O(13) | 2.113(6)   | O(12)-Ni(2)-O(10) | 82.9(2)   |
| Ni(2)-O(3)  | 2.013(6)   | O(9)-Ni(3)-O(11)  | 83.3(2)   |
| Ni(2)-O(11) | 2.031(5)   | O(9)-Ni(3)-O(12)  | 81.1(2)   |
| Ni(2)-O(12) | 2.037(5)   | O(11)-Ni(3)-O(12) | 82.15(19) |
| Ni(2)-O(4)  | 2.043(6)   | O(10)-Ni(4)-O(12) | 83.3(2)   |
| Ni(2)-O(10) | 2.052(5)   | O(12)-Ni(4)-O(9)  | 81.5(2)   |
| Ni(2)-O(15) | 2.153(6)   | O(10)-Ni(4)-O(9)  | 83.3(2)   |
| Ni(3)-O(5)  | 1.998(6)   | Ni(3)-O(9)-Ni(1)  | 97.0(2)   |
| Ni(3)-O(9)  | 2.029(5)   | Ni(3)-O(9)-Ni(4)  | 99.0(2)   |
| Ni(3)-O(6)  | 2.033(6)   | Ni(4)-O(9)-Ni(1)  | 95.5(2)   |
| Ni(3)-O(11) | 2.057(5)   | Ni(1)-O(10)-Ni(4) | 96.5(2)   |
| Ni(3)-O(12) | 2.073(5)   | Ni(1)-O(10)-Ni(2) | 97.6(2)   |
| Ni(3)-O(14) | 2.127(6)   | Ni(4)-O(10)-Ni(2) | 96.2(2)   |
| Ni(4)-O(7)  | 2.026(6)   | Ni(2)-O(11)-Ni(3) | 96.9(2)   |
| Ni(4)-O(8)  | 2.033(6)   | Ni(2)-O(11)-Ni(1) | 97.4(2)   |
| Ni(4)-O(10) | 2.035(5)   | Ni(3)-O(11)-Ni(1) | 95.8(2)   |
| Ni(4)-O(12) | 2.037(5)   | Ni(2)-O(12)-Ni(4) | 96.6(2)   |
| Ni(4)-O(9)  | 2.048(5)   | Ni(2)-O(12)-Ni(3) | 96.2(2)   |
| Ni(4)-O(16) | 2.087(7)   | Ni(4)-O(12)-Ni(3) | 97.9(2)   |
| Ni(1)-Ni(2) | 3.0724(16) |                   |           |
| Ni(1)-Ni(3) | 3.0531(15) |                   |           |
| Ni(1)-Ni(4) | 3.0332(15) |                   |           |
| Ni(2)-Ni(3) | 3.0588(15) |                   |           |
| Ni(2)-Ni(4) | 3.0407(15) |                   |           |
| Ni(3)-Ni(4) | 3.1001(15) |                   |           |

**Table S3.** Non-classical hydrogen bonds and other intermolecular interactions with distances shorter than the sum of van der Waals radii for **4**

| D—H...A            | D—H           | H...A | D...A     | D—H...A  | Symmetry codes    |
|--------------------|---------------|-------|-----------|----------|-------------------|
| C36—H36A...Cl2     | 0.96          | 2.69  | 3.543(13) | 149      | 2-x, 1/2+y, 1/2-z |
| C17—H17...Br1      | 0.93          | 3.07  | 3.458(9)  | 107      | 2-x, 1-y, -z      |
| C21—H21...H29B—C29 | 0.93,<br>0.96 | 2.30  | 3.585(13) | 157, 110 | 1-x, -y, 1-z      |
| C21—H21...H29A—C29 | 0.93,<br>0.96 | 2.51  | 3.585(13) | 125, 96  | 1-x, -y, 1-z      |
| C26—H26...H34A—C34 | 0.93,<br>0.96 | 2.59  | 3.645(13) | 129, 94  | 1-x, -y, 1-z      |
| C26—H26...H34B—C34 | 0.93,<br>0.96 | 2.51  | 3.645(13) | 165, 99  | 1-x, -y, 1-z      |

**Table S4.** Comparison of experimental and theoretical structures for compound **4**.

|                 | DFT   | Experimental |
|-----------------|-------|--------------|
| Ni1-Ni2         | 3.110 | 3.072        |
| Ni1-Ni3         | 3.039 | 3.053        |
| Ni1-Ni4         | 3.041 | 3.033        |
| Ni2-Ni3         | 3.042 | 3.059        |
| Ni2-Ni4         | 3.039 | 3.041        |
| Ni3-Ni4         | 3.108 | 3.100        |
| Ni1-O9          | 2.061 | 2.049        |
| Ni1-O10         | 2.048 | 2.030        |
| Ni1-O11         | 2.053 | 2.058        |
| Ni2-O10         | 2.053 | 2.052        |
| Ni2-O11         | 2.049 | 2.031        |
| Ni2-O12         | 2.059 | 2.037        |
| Ni3-O9          | 2.047 | 2.029        |
| Ni3-O11         | 2.059 | 2.058        |
| Ni3-O12         | 2.054 | 2.073        |
| Ni4-O9          | 2.056 | 2.048        |
| Ni4-O10         | 2.058 | 2.034        |
| Ni4-O12         | 2.047 | 2.038        |
| Ni1-O10-Ni2     | 98.6  | 97.65        |
| Ni1-O11-Ni2     | 98.6  | 97.41        |
| Ni1-O9-Ni3      | 95.4  | 96.95        |
| Ni1-O11-Ni3     | 95.3  | 95.76        |
| Ni1-O9-Ni4      | 95.3  | 95.52        |
| Ni1-O10-Ni4     | 95.6  | 96.53        |
| Ni2-O11-Ni3     | 95.5  | 96.87        |
| Ni2-O12-Ni3     | 95.4  | 96.16        |
| Ni2-O10-Ni4     | 95.3  | 96.18        |
| Ni2-O12-Ni4     | 95.5  | 96.51        |
| Ni3-O9-Ni4      | 98.5  | 98.97        |
| Ni3-O12-Ni4     | 98.5  | 97.87        |
| Ni1-Ni2-Ni3-Ni4 | 69.3  | 69.56        |
| O9-O10-O11-O12  | 67.7  | 68.96        |

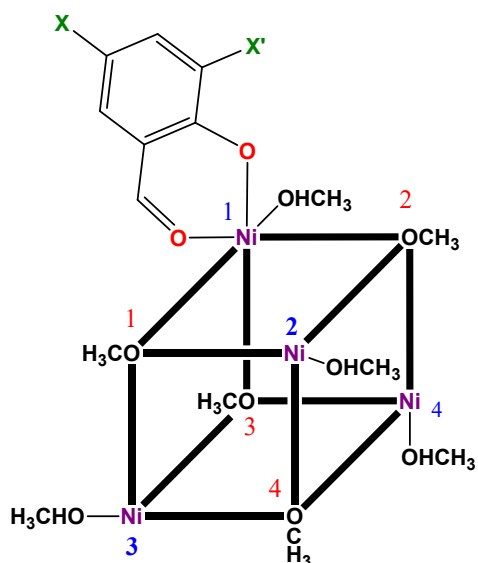

**Figure S2.** Atom labeling for tables in Supporting Information

**Table S5.** Calculated magnetic coupling constants  $J$  for compounds **1-3**.

| Compound 1 |              |                              |
|------------|--------------|------------------------------|
|            | Distance (Å) | $J$ calc.(cm <sup>-1</sup> ) |
| Ni1-Ni2    | 3.115        | $J_1 = 6.58$                 |
| Ni1-Ni3    | 3.041        | $J_2 = 13.08$                |
| Ni1-Ni4    | 3.041        | $J_3 = 13.46$                |
| Ni2-Ni3    | 3.041        | $J_4 = 13.47$                |
| Ni2-Ni4    | 3.041        | $J_5 = 13.15$                |
| Ni3-Ni4    | 3.115        | $J_6 = 6.73$                 |
| Compound 2 |              |                              |
|            | Distance (Å) | $J$ calc.(cm <sup>-1</sup> ) |
| Ni1-Ni2    | 3.114        | $J_1 = 6.87$                 |
| Ni1-Ni3    | 3.041        | $J_2 = 12.92$                |
| Ni1-Ni4    | 3.041        | $J_3 = 13.28$                |
| Ni2-Ni3    | 3.041        | $J_4 = 13.18$                |
| Ni2-Ni4    | 3.041        | $J_5 = 12.95$                |
| Ni3-Ni4    | 3.114        | $J_6 = 6.88$                 |
| Compound 3 |              |                              |
|            | Distance (Å) | $J$ calc.(cm <sup>-1</sup> ) |
| Ni1-Ni2    | 3.116        | $J_1 = 7.74$                 |
| Ni1-Ni3    | 3.040        | $J_2 = 13.10$                |
| Ni1-Ni4    | 3.040        | $J_3 = -6439.48$             |
| Ni2-Ni3    | 3.040        | $J_4 = 13.46$                |
| Ni2-Ni4    | 3.040        | $J_5 = 13.20$                |
| Ni3-Ni4    | 3.116        | $J_6 = 7.54$                 |

**Table S6.** Calculated magnetic coupling constants  $J$  for compound **4** considering both optimized and experimental structures.

| Compound <b>4</b> |              |                             |                     |                              |
|-------------------|--------------|-----------------------------|---------------------|------------------------------|
| DFT Calculated    |              |                             | Experimental Values |                              |
|                   | Distance (Å) | $J$ DFT.(cm <sup>-1</sup> ) | Distance (Å)        | $J$ calc.(cm <sup>-1</sup> ) |
| Ni1-Ni2           | 3.110        | $J_1 = 7.45$                | 3.072               | $J_1 = 12.06$                |
| Ni1-Ni3           | 3.039        | $J_2 = 12.88$               | 3.053               | $J_2 = 12.56$                |
| Ni1-Ni4           | 3.041        | $J_3 = 12.95$               | 3.033               | $J_3 = 14.01$                |
| Ni2-Ni3           | 3.042        | $J_4 = 12.86$               | 3.059               | $J_4 = 12.30$                |
| Ni2-Ni4           | 3.039        | $J_5 = 12.99$               | 3.041               | $J_5 = 13.58$                |
| Ni3-Ni4           | 3.108        | $J_6 = 7.74$                | 3.100               | $J_6 = 8.53$                 |

**Table S7.** Mulliken spin densities computed for the high spin configuration of the [Ni<sub>2</sub>] dimer model of compound **1**. See Figure S1 for labeling of atoms.

| Atom Label <sup>a</sup>   | Spin Density | Atom Label <sup>a</sup>  | Spin Density |
|---------------------------|--------------|--------------------------|--------------|
| $J_1$                     |              |                          |              |
| Ni(1)                     | 1.725        | Ni(2)                    | 1.725        |
| O <sub>CH3O</sub> -(1)    | 0.105        | O <sub>CH3O</sub> -(2)   | 0.105        |
| O <sub>CH3O</sub> -(3)    | 0.052        | O <sub>CH3O</sub> -(4)   | 0.052        |
| O <sub>CH3OH</sub> (1)    | 0.032        | O <sub>CH3OH</sub> (2)   | 0.032        |
| O <sub>aldehyde</sub> (1) | 0.034        | O <sub>phenoxy</sub> (1) | 0.037        |
| O <sub>aldehyde</sub> (2) | 0.034        | O <sub>phenoxy</sub> (2) | 0.037        |
| $J_2$                     |              |                          |              |
| Ni(1)                     | 1.724        | Ni(3)                    | 1.724        |
| O <sub>CH3O</sub> -(1)    | 0.106        | O <sub>CH3O</sub> -(2)   | 0.052        |
| O <sub>CH3O</sub> -(3)    | 0.103        | O <sub>CH3O</sub> -(4)   | 0.054        |
| O <sub>CH3OH</sub> (1)    | 0.032        | O <sub>CH3OH</sub> (3)   | 0.032        |
| O <sub>aldehyde</sub> (1) | 0.034        | O <sub>phenoxy</sub> (1) | 0.037        |
| O <sub>aldehyde</sub> (3) | 0.034        | O <sub>phenoxy</sub> (3) | 0.037        |
| $J_3$                     |              |                          |              |
| Ni(1)                     | 1.724        | Ni(4)                    | 1.724        |
| O <sub>CH3O</sub> -(1)    | 0.054        | O <sub>CH3O</sub> -(2)   | 0.103        |
| O <sub>CH3O</sub> -(3)    | 0.106        | O <sub>CH3O</sub> -(4)   | 0.052        |
| O <sub>CH3OH</sub> (1)    | 0.032        | O <sub>CH3OH</sub> (4)   | 0.032        |
| O <sub>aldehyde</sub> (1) | 0.034        | O <sub>phenoxy</sub> (1) | 0.037        |
| O <sub>aldehyde</sub> (4) | 0.034        | O <sub>phenoxy</sub> (4) | 0.037        |
| $J_4$                     |              |                          |              |
| Ni(2)                     | 1.724        | Ni(3)                    | 1.724        |
| O <sub>CH3O</sub> -(1)    | 0.103        | O <sub>CH3O</sub> -(2)   | 0.054        |
| O <sub>CH3O</sub> -(3)    | 0.052        | O <sub>CH3O</sub> -(4)   | 0.106        |
| O <sub>CH3OH</sub> (2)    | 0.032        | O <sub>CH3OH</sub> (3)   | 0.032        |
| O <sub>aldehyde</sub> (2) | 0.034        | O <sub>phenoxy</sub> (2) | 0.037        |
| O <sub>aldehyde</sub> (3) | 0.034        | O <sub>phenoxy</sub> (3) | 0.037        |
| $J_5$                     |              |                          |              |
| Ni(2)                     | 1.724        | Ni(4)                    | 1.724        |
| O <sub>CH3O</sub> -(1)    | 0.052        | O <sub>CH3O</sub> -(2)   | 0.106        |
| O <sub>CH3O</sub> -(3)    | 0.054        | O <sub>CH3O</sub> -(4)   | 0.103        |

|                           |       |                          |       |
|---------------------------|-------|--------------------------|-------|
| O <sub>CH3OH</sub> (2)    | 0.032 | O <sub>CH3OH</sub> (4)   | 0.032 |
| O <sub>aldehyde</sub> (2) | 0.034 | O <sub>phenoxy</sub> (2) | 0.037 |
| O <sub>aldehyde</sub> (4) | 0.034 | O <sub>phenoxy</sub> (4) | 0.037 |
| $J_6$                     |       |                          |       |
| Ni(3)                     | 1.725 | Ni(4)                    | 1.725 |
| O <sub>CH3O-</sub> (1)    | 0.052 | O <sub>CH3O-</sub> (2)   | 0.052 |
| O <sub>CH3O-</sub> (3)    | 0.105 | O <sub>CH3O-</sub> (4)   | 0.105 |
| O <sub>CH3OH</sub> (3)    | 0.032 | O <sub>CH3OH</sub> (4)   | 0.032 |
| O <sub>aldehyde</sub> (3) | 0.034 | O <sub>phenoxy</sub> (3) | 0.037 |
| O <sub>aldehyde</sub> (4) | 0.034 | O <sub>phenoxy</sub> (4) | 0.037 |

<sup>a</sup>O<sub>CH3O-</sub>(X) methoxy(X), O<sub>CH3OH</sub>(X) methanol bonded to Ni(X), O<sub>aldehyde</sub>(X) aldehyde oxygen bonded to Ni(X), O<sub>phenoxy</sub>(X) phenoxy oxygen bonded to Ni(X).

**Table S8.** Mulliken spin densities computed for the high spin configuration of the [Ni<sub>2</sub>] dimer models of compound **2**. See Figure S1 for labeling of atoms.

| Atom Label <sup>a</sup>   | Spin Density | Atom Label <sup>a</sup>  | Spin Density |
|---------------------------|--------------|--------------------------|--------------|
| $J_1$                     |              |                          |              |
| Ni(1)                     | 1.724        | Ni(2)                    | 1.724        |
| O <sub>CH3O-</sub> (1)    | 0.106        | O <sub>CH3O-</sub> (2)   | 0.106        |
| O <sub>CH3O-</sub> (3)    | 0.052        | O <sub>CH3O-</sub> (4)   | 0.052        |
| O <sub>CH3OH</sub> (1)    | 0.032        | O <sub>CH3OH</sub> (2)   | 0.032        |
| O <sub>aldehyde</sub> (1) | 0.034        | O <sub>phenoxy</sub> (1) | 0.036        |
| O <sub>aldehyde</sub> (2) | 0.034        | O <sub>phenoxy</sub> (2) | 0.036        |
| $J_2$                     |              |                          |              |
| Ni(1)                     | 1.724        | Ni(3)                    | 1.724        |
| O <sub>CH3O-</sub> (1)    | 0.106        | O <sub>CH3O-</sub> (2)   | 0.052        |
| O <sub>CH3O-</sub> (3)    | 0.104        | O <sub>CH3O-</sub> (4)   | 0.055        |
| O <sub>CH3OH</sub> (1)    | 0.032        | O <sub>CH3OH</sub> (3)   | 0.032        |
| O <sub>aldehyde</sub> (1) | 0.034        | O <sub>phenoxy</sub> (1) | 0.036        |
| O <sub>aldehyde</sub> (3) | 0.034        | O <sub>phenoxy</sub> (3) | 0.036        |
| $J_3$                     |              |                          |              |
| Ni(1)                     | 1.724        | Ni(4)                    | 1.724        |
| O <sub>CH3O-</sub> (1)    | 0.055        | O <sub>CH3O-</sub> (2)   | 0.104        |
| O <sub>CH3O-</sub> (3)    | 0.106        | O <sub>CH3O-</sub> (4)   | 0.052        |
| O <sub>CH3OH</sub> (1)    | 0.032        | O <sub>CH3OH</sub> (4)   | 0.032        |
| O <sub>aldehyde</sub> (1) | 0.034        | O <sub>phenoxy</sub> (1) | 0.036        |
| O <sub>aldehyde</sub> (4) | 0.034        | O <sub>phenoxy</sub> (4) | 0.036        |
| $J_4$                     |              |                          |              |
| Ni(2)                     | 1.724        | Ni(3)                    | 1.724        |
| O <sub>CH3O-</sub> (1)    | 0.104        | O <sub>CH3O-</sub> (2)   | 0.055        |
| O <sub>CH3O-</sub> (3)    | 0.052        | O <sub>CH3O-</sub> (4)   | 0.106        |
| O <sub>CH3OH</sub> (2)    | 0.032        | O <sub>CH3OH</sub> (3)   | 0.032        |
| O <sub>aldehyde</sub> (2) | 0.034        | O <sub>phenoxy</sub> (2) | 0.036        |
| O <sub>aldehyde</sub> (3) | 0.034        | O <sub>phenoxy</sub> (3) | 0.036        |
| $J_5$                     |              |                          |              |
| Ni(2)                     | 1.724        | Ni(4)                    | 1.724        |
| O <sub>CH3O-</sub> (1)    | 0.052        | O <sub>CH3O-</sub> (2)   | 0.106        |
| O <sub>CH3O-</sub> (3)    | 0.055        | O <sub>CH3O-</sub> (4)   | 0.104        |



|                           |       |                          |       |
|---------------------------|-------|--------------------------|-------|
| O <sub>CH3OH</sub> (2)    | 0.032 | O <sub>CH3OH</sub> (4)   | 0.032 |
| O <sub>aldehyde</sub> (2) | 0.034 | O <sub>phenoxy</sub> (2) | 0.036 |
| O <sub>aldehyde</sub> (4) | 0.034 | O <sub>phenoxy</sub> (4) | 0.036 |
| $J_6$                     |       |                          |       |
| Ni(3)                     | 1.724 | Ni(4)                    | 1.724 |
| O <sub>CH3O-</sub> (1)    | 0.052 | O <sub>CH3O-</sub> (2)   | 0.052 |
| O <sub>CH3O-</sub> (3)    | 0.106 | O <sub>CH3O-</sub> (4)   | 0.106 |
| O <sub>CH3OH</sub> (3)    | 0.032 | O <sub>CH3OH</sub> (4)   | 0.032 |
| O <sub>aldehyde</sub> (3) | 0.034 | O <sub>phenoxy</sub> (3) | 0.036 |
| O <sub>aldehyde</sub> (4) | 0.034 | O <sub>phenoxy</sub> (4) | 0.036 |

<sup>a</sup>O<sub>CH3O-</sub>(X) methoxy(X), O<sub>CH3OH</sub>(X) methanol bonded to Ni(X), O<sub>aldehyde</sub>(X) aldehyde oxygen bonded to Ni(X), O<sub>phenoxy</sub>(X) phenoxy oxygen bonded to Ni(X).

**Table S9.** Mulliken spin densities computed for the high spin configuration of the [Ni<sub>2</sub>] dimer models of compound **3**. See Figure S1 for labeling of atoms.

| Atom Label <sup>a</sup>   | Spin Density | Atom Label <sup>a</sup>  | Spin Density |
|---------------------------|--------------|--------------------------|--------------|
| $J_1$                     |              |                          |              |
| Ni(1)                     | 1.724        | Ni(2)                    | 1.724        |
| O <sub>CH3O-</sub> (1)    | 0.106        | O <sub>CH3O-</sub> (2)   | 0.106        |
| O <sub>CH3O-</sub> (3)    | 0.052        | O <sub>CH3O-</sub> (4)   | 0.052        |
| O <sub>CH3OH</sub> (1)    | 0.031        | O <sub>CH3OH</sub> (2)   | 0.031        |
| O <sub>aldehyde</sub> (1) | 0.035        | O <sub>phenoxy</sub> (1) | 0.035        |
| O <sub>aldehyde</sub> (2) | 0.035        | O <sub>phenoxy</sub> (2) | 0.035        |
| $J_2$                     |              |                          |              |
| Ni(1)                     | 1.723        | Ni(3)                    | 1.723        |
| O <sub>CH3O-</sub> (1)    | 0.106        | O <sub>CH3O-</sub> (2)   | 0.053        |
| O <sub>CH3O-</sub> (3)    | 0.104        | O <sub>CH3O-</sub> (4)   | 0.055        |
| O <sub>CH3OH</sub> (1)    | 0.032        | O <sub>CH3OH</sub> (3)   | 0.032        |
| O <sub>aldehyde</sub> (1) | 0.035        | O <sub>phenoxy</sub> (1) | 0.036        |
| O <sub>aldehyde</sub> (3) | 0.035        | O <sub>phenoxy</sub> (3) | 0.036        |
| $J_3$                     |              |                          |              |
| Ni(1)                     | 1.742        | Ni(4)                    | -0.012       |
| O <sub>CH3O-</sub> (1)    | 0.060        | O <sub>CH3O-</sub> (2)   | 0.037        |
| O <sub>CH3O-</sub> (3)    | 0.010        | O <sub>CH3O-</sub> (4)   | 0.063        |
| O <sub>CH3OH</sub> (1)    | 0.034        | O <sub>CH3OH</sub> (4)   | -0.025       |
| O <sub>aldehyde</sub> (1) | 0.276        | O <sub>phenoxy</sub> (1) | 0.315        |
| O <sub>aldehyde</sub> (4) | -0.009       | O <sub>phenoxy</sub> (4) | 0.043        |
| $J_4$                     |              |                          |              |
| Ni(2)                     | 1.723        | Ni(3)                    | 1.723        |
| O <sub>CH3O-</sub> (1)    | 0.104        | O <sub>CH3O-</sub> (2)   | 0.055        |
| O <sub>CH3O-</sub> (3)    | 0.052        | O <sub>CH3O-</sub> (4)   | 0.106        |
| O <sub>CH3OH</sub> (2)    | 0.032        | O <sub>CH3OH</sub> (3)   | 0.032        |
| O <sub>aldehyde</sub> (2) | 0.035        | O <sub>phenoxy</sub> (2) | 0.036        |
| O <sub>aldehyde</sub> (3) | 0.035        | O <sub>phenoxy</sub> (3) | 0.036        |
| $J_5$                     |              |                          |              |
| Ni(2)                     | 1.723        | Ni(4)                    | 1.723        |
| O <sub>CH3O-</sub> (1)    | 0.052        | O <sub>CH3O-</sub> (2)   | 0.106        |
| O <sub>CH3O-</sub> (3)    | 0.055        | O <sub>CH3O-</sub> (4)   | 0.104        |

|                           |       |                          |       |
|---------------------------|-------|--------------------------|-------|
| O <sub>CH3OH</sub> (2)    | 0.032 | O <sub>CH3OH</sub> (4)   | 0.032 |
| O <sub>aldehyde</sub> (2) | 0.035 | O <sub>phenoxy</sub> (2) | 0.036 |
| O <sub>aldehyde</sub> (4) | 0.035 | O <sub>phenoxy</sub> (4) | 0.036 |
| $J_6$                     |       |                          |       |
| Ni(3)                     | 1.724 | Ni(4)                    | 1.724 |
| O <sub>CH3O-</sub> (1)    | 0.052 | O <sub>CH3O-</sub> (2)   | 0.052 |
| O <sub>CH3O-</sub> (3)    | 0.106 | O <sub>CH3O-</sub> (4)   | 0.106 |
| O <sub>CH3OH</sub> (3)    | 0.031 | O <sub>CH3OH</sub> (4)   | 0.031 |
| O <sub>aldehyde</sub> (3) | 0.035 | O <sub>phenoxy</sub> (3) | 0.035 |
| O <sub>aldehyde</sub> (4) | 0.035 | O <sub>phenoxy</sub> (4) | 0.035 |

<sup>a</sup>O<sub>CH3O-</sub>(X) methoxy(X), O<sub>CH3OH</sub>(X) methanol bonded to Ni(X), O<sub>aldehyde</sub>(X) aldehyde oxygen bonded to Ni(X), O<sub>phenoxy</sub>(X) phenoxy oxygen bonded to Ni(X).

**Table S10.** Mulliken spin densities computed for the high spin configuration of the optimized structure of [Ni<sub>2</sub>] dimer models of compound **4**. See Figure S1 for labeling of atoms.

| Atom Label <sup>a</sup>   | Spin Density | Atom Label <sup>a</sup>  | Spin Density |
|---------------------------|--------------|--------------------------|--------------|
| $J_1$                     |              |                          |              |
| Ni(1)                     | 1.724        | Ni(2)                    | 1.724        |
| O <sub>CH3O-</sub> (1)    | 0.106        | O <sub>CH3O-</sub> (2)   | 0.106        |
| O <sub>CH3O-</sub> (3)    | 0.052        | O <sub>CH3O-</sub> (4)   | 0.052        |
| O <sub>CH3OH</sub> (1)    | 0.032        | O <sub>CH3OH</sub> (2)   | 0.032        |
| O <sub>aldehyde</sub> (1) | 0.034        | O <sub>phenoxy</sub> (1) | 0.036        |
| O <sub>aldehyde</sub> (2) | 0.034        | O <sub>phenoxy</sub> (2) | 0.036        |
| $J_2$                     |              |                          |              |
| Ni(1)                     | 1.723        | Ni(3)                    | 1.723        |
| O <sub>CH3O-</sub> (1)    | 0.106        | O <sub>CH3O-</sub> (2)   | 0.052        |
| O <sub>CH3O-</sub> (3)    | 0.103        | O <sub>CH3O-</sub> (4)   | 0.055        |
| O <sub>CH3OH</sub> (1)    | 0.032        | O <sub>CH3OH</sub> (3)   | 0.032        |
| O <sub>aldehyde</sub> (1) | 0.034        | O <sub>phenoxy</sub> (1) | 0.036        |
| O <sub>aldehyde</sub> (3) | 0.035        | O <sub>phenoxy</sub> (3) | 0.036        |
| $J_3$                     |              |                          |              |
| Ni(1)                     | 1.723        | Ni(4)                    | 1.723        |
| O <sub>CH3O-</sub> (1)    | 0.055        | O <sub>CH3O-</sub> (2)   | 0.104        |
| O <sub>CH3O-</sub> (3)    | 0.106        | O <sub>CH3O-</sub> (4)   | 0.052        |
| O <sub>CH3OH</sub> (1)    | 0.032        | O <sub>CH3OH</sub> (4)   | 0.032        |
| O <sub>aldehyde</sub> (1) | 0.034        | O <sub>phenoxy</sub> (1) | 0.036        |
| O <sub>aldehyde</sub> (4) | 0.034        | O <sub>phenoxy</sub> (4) | 0.037        |
| $J_4$                     |              |                          |              |
| Ni(2)                     | 1.724        | Ni(3)                    | 1.723        |
| O <sub>CH3O-</sub> (1)    | 0.103        | O <sub>CH3O-</sub> (2)   | 0.055        |
| O <sub>CH3O-</sub> (3)    | 0.052        | O <sub>CH3O-</sub> (4)   | 0.106        |
| O <sub>CH3OH</sub> (2)    | 0.032        | O <sub>CH3OH</sub> (3)   | 0.032        |
| O <sub>aldehyde</sub> (2) | 0.034        | O <sub>phenoxy</sub> (2) | 0.034        |
| O <sub>aldehyde</sub> (3) | 0.035        | O <sub>phenoxy</sub> (3) | 0.036        |
| $J_5$                     |              |                          |              |
| Ni(2)                     | 1.723        | Ni(4)                    | 1.724        |
| O <sub>CH3O-</sub> (1)    | 0.052        | O <sub>CH3O-</sub> (2)   | 0.106        |
| O <sub>CH3O-</sub> (3)    | 0.054        | O <sub>CH3O-</sub> (4)   | 0.103        |

|                           |       |                          |       |
|---------------------------|-------|--------------------------|-------|
| O <sub>CH3OH</sub> (2)    | 0.032 | O <sub>CH3OH</sub> (4)   | 0.032 |
| O <sub>aldehyde</sub> (2) | 0.034 | O <sub>phenoxy</sub> (2) | 0.036 |
| O <sub>aldehyde</sub> (4) | 0.034 | O <sub>phenoxy</sub> (4) | 0.037 |
| $J_6$                     |       |                          |       |
| Ni(3)                     | 1.723 | Ni(4)                    | 1.724 |
| O <sub>CH3O-</sub> (1)    | 0.052 | O <sub>CH3O-</sub> (2)   | 0.052 |
| O <sub>CH3O-</sub> (3)    | 0.106 | O <sub>CH3O-</sub> (4)   | 0.106 |
| O <sub>CH3OH</sub> (3)    | 0.032 | O <sub>CH3OH</sub> (4)   | 0.032 |
| O <sub>aldehyde</sub> (3) | 0.035 | O <sub>phenoxy</sub> (3) | 0.036 |
| O <sub>aldehyde</sub> (4) | 0.034 | O <sub>phenoxy</sub> (4) | 0.036 |

<sup>a</sup>O<sub>CH3O-</sub>(X) methoxy(X), O<sub>CH3OH</sub>(X) methanol bonded to Ni(X), O<sub>aldehyde</sub>(X) aldehyde oxygen bonded to Ni(X), O<sub>phenoxy</sub>(X) phenoxy oxygen bonded to Ni(X).

**Table S11.** Mulliken spin densities computed for the high spin configuration of the experimental structure of [Ni<sub>2</sub>] dimer models of compound **4**. See Figure S1 for labeling of atoms.

| Atom Label <sup>a</sup>   | Spin Density | Atom Label <sup>a</sup>  | Spin Density |
|---------------------------|--------------|--------------------------|--------------|
| $J_1$                     |              |                          |              |
| Ni(1)                     | 1.722        | Ni(2)                    | 1.720        |
| O <sub>CH3O-</sub> (1)    | 0.114        | O <sub>CH3O-</sub> (2)   | 0.113        |
| O <sub>CH3O-</sub> (3)    | 0.055        | O <sub>CH3O-</sub> (4)   | 0.056        |
| O <sub>CH3OH</sub> (1)    | 0.021        | O <sub>CH3OH</sub> (2)   | 0.019        |
| O <sub>aldehyde</sub> (1) | 0.038        | O <sub>phenoxy</sub> (1) | 0.039        |
| O <sub>aldehyde</sub> (2) | 0.038        | O <sub>phenoxy</sub> (2) | 0.037        |
| $J_2$                     |              |                          |              |
| Ni(1)                     | 1.723        | Ni(3)                    | 1.726        |
| O <sub>CH3O-</sub> (1)    | 0.110        | O <sub>CH3O-</sub> (2)   | 0.054        |
| O <sub>CH3O-</sub> (3)    | 0.110        | O <sub>CH3O-</sub> (4)   | 0.056        |
| O <sub>CH3OH</sub> (1)    | 0.021        | O <sub>CH3OH</sub> (3)   | 0.022        |
| O <sub>aldehyde</sub> (1) | 0.037        | O <sub>phenoxy</sub> (1) | 0.039        |
| O <sub>aldehyde</sub> (3) | 0.036        | O <sub>phenoxy</sub> (3) | 0.040        |
| $J_3$                     |              |                          |              |
| Ni(1)                     | 1.722        | Ni(4)                    | 1.722        |
| O <sub>CH3O-</sub> (1)    | 0.059        | O <sub>CH3O-</sub> (2)   | 0.109        |
| O <sub>CH3O-</sub> (3)    | 0.113        | O <sub>CH3O-</sub> (4)   | 0.054        |
| O <sub>CH3OH</sub> (1)    | 0.021        | O <sub>CH3OH</sub> (4)   | 0.023        |
| O <sub>aldehyde</sub> (1) | 0.038        | O <sub>phenoxy</sub> (1) | 0.039        |
| O <sub>aldehyde</sub> (4) | 0.036        | O <sub>phenoxy</sub> (4) | 0.040        |
| $J_4$                     |              |                          |              |
| Ni(2)                     | 1.721        | Ni(3)                    | 1.725        |
| O <sub>CH3O-</sub> (1)    | 0.108        | O <sub>CH3O-</sub> (2)   | 0.060        |
| O <sub>CH3O-</sub> (3)    | 0.056        | O <sub>CH3O-</sub> (4)   | 0.111        |
| O <sub>CH3OH</sub> (2)    | 0.019        | O <sub>CH3OH</sub> (3)   | 0.022        |
| O <sub>aldehyde</sub> (2) | 0.038        | O <sub>phenoxy</sub> (2) | 0.037        |
| O <sub>aldehyde</sub> (3) | 0.036        | O <sub>phenoxy</sub> (3) | 0.040        |
| $J_5$                     |              |                          |              |
| Ni(2)                     | 1.720        | Ni(4)                    | 1.722        |
| O <sub>CH3O-</sub> (1)    | 0.056        | O <sub>CH3O-</sub> (2)   | 0.114        |
| O <sub>CH3O-</sub> (3)    | 0.060        | O <sub>CH3O-</sub> (4)   | 0.109        |

|                           |       |                          |       |
|---------------------------|-------|--------------------------|-------|
| O <sub>CH3OH</sub> (2)    | 0.019 | O <sub>CH3OH</sub> (4)   | 0.023 |
| O <sub>aldehyde</sub> (2) | 0.037 | O <sub>phenoxy</sub> (2) | 0.037 |
| O <sub>aldehyde</sub> (4) | 0.037 | O <sub>phenoxy</sub> (4) | 0.040 |
| $J_6$                     |       |                          |       |
| Ni(3)                     | 1.726 | Ni(4)                    | 1.723 |
| O <sub>CH3O-</sub> (1)    | 0.053 | O <sub>CH3O-</sub> (2)   | 0.055 |
| O <sub>CH3O-</sub> (3)    | 0.115 | O <sub>CH3O-</sub> (4)   | 0.109 |
| O <sub>CH3OH</sub> (3)    | 0.022 | O <sub>CH3OH</sub> (4)   | 0.023 |
| O <sub>aldehyde</sub> (3) | 0.037 | O <sub>phenoxy</sub> (3) | 0.040 |
| O <sub>aldehyde</sub> (4) | 0.037 | O <sub>phenoxy</sub> (4) | 0.040 |

<sup>a</sup>O<sub>CH3O-</sub>(X) methoxy(X), O<sub>CH3OH</sub>(X) methanol bonded to Ni(X), O<sub>aldehyde</sub>(X) aldehyde oxygen bonded to Ni(X), O<sub>phenoxy</sub>(X) phenoxy oxygen bonded to Ni(X).

**Table S12.** Orbital contributions (%) to the spin densities

| Orbital contributions to the spin densities, $J_1$ |       |       |       |       |       |
|----------------------------------------------------|-------|-------|-------|-------|-------|
|                                                    | 1     | 2     | 3     | 4opt. | 4exp. |
| Ni(1)dz2                                           | 21.28 | 21.31 | 21.31 | 12.97 | 14.48 |
| Ni(1)dx2-y2                                        | 3.42  | 3.73  | 4.07  | 18.25 | 19.01 |
| Ni(1)dxy                                           | 18.10 | 17.80 | 17.46 | 0.27  | 0.22  |
| Ni(2)dz2                                           | 21.28 | 21.31 | 21.31 | 14.98 | 14.29 |
| Ni(2)dx2-y2                                        | 3.42  | 3.73  | 4.07  | 18.52 | 18.54 |
| Ni(2)dxy                                           | 18.09 | 17.80 | 17.46 | 1.31  | 1.21  |
| Orbital contributions to the spin densities, $J_2$ |       |       |       |       |       |
|                                                    | 1     | 2     | 3     | 4opt. | 4exp. |
| Ni(1)dz2                                           | 21.30 | 21.33 | 21.33 | 12.98 | 14.50 |
| Ni(1)dx2-y2                                        | 3.42  | 3.72  | 4.06  | 18.27 | 19.04 |
| Ni(1)dxy                                           | 18.07 | 17.78 | 17.44 | 0.27  | 0.22  |
| Ni(3)dz2                                           | 21.30 | 21.33 | 21.33 | 15.30 | 15.77 |
| Ni(3)dx2-y2                                        | 3.44  | 3.74  | 4.09  | 19.16 | 18.73 |
| Ni(3)dxy                                           | 18.05 | 17.76 | 17.41 | 0.25  | 0.63  |
| Orbital contributions to the spin densities, $J_3$ |       |       |       |       |       |
|                                                    | 1     | 2     | 3     | 4opt. | 4exp. |
| Ni(1)dz2                                           | 21.30 | 21.33 | 21.02 | 12.97 | 14.48 |
| Ni(1)dx2-y2                                        | 3.44  | 3.74  | 4.90  | 18.24 | 19.00 |
| Ni(1)dxy                                           | 18.05 | 17.76 | 17.32 | 0.27  | 0.22  |
| Ni(4)dz2                                           | 21.30 | 21.33 | -6.74 | 12.68 | 13.25 |
| Ni(4)dx2-y2                                        | 3.42  | 3.72  | 1.25  | 17.35 | 18.09 |
| Ni(4)dxy                                           | 18.07 | 17.78 | 5.36  | 1.24  | 0.44  |
| Orbital contributions to the spin densities, $J_4$ |       |       |       |       |       |
|                                                    | 1     | 2     | 3     | 4opt. | 4exp. |
| Ni(2)dz2                                           | 21.30 | 21.33 | 21.33 | 14.95 | 14.25 |
| Ni(2)dx2-y2                                        | 3.43  | 3.74  | 4.09  | 18.54 | 18.58 |
| Ni(2)dxy                                           | 18.06 | 17.76 | 17.42 | 1.30  | 1.19  |

|                                                    |          |          |          |              |              |
|----------------------------------------------------|----------|----------|----------|--------------|--------------|
| Ni(3)dz2                                           | 21.306   | 21.33    | 21.33    | 15.32        | 15.77        |
| Ni(3)dx2-y2                                        | 3.41     | 3.72     | 4.07     | 19.15        | 18.72        |
| Ni(3)dxy                                           | 18.08    | 17.78    | 17.43    | 0.25         | 0.64         |
| Orbital contributions to the spin densities, $J_5$ |          |          |          |              |              |
|                                                    | <b>1</b> | <b>2</b> | <b>3</b> | <b>4opt.</b> | <b>4exp.</b> |
| Ni(2)dz2                                           | 21.30    | 21.33    | 21.33    | 14.93        | 15.82        |
| Ni(2)dx2-y2                                        | 3.42     | 3.72     | 4.06     | 18.53        | 18.74        |
| Ni(2)dxy                                           | 18.07    | 17.78    | 17.44    | 1.31         | 0.63         |
| Ni(4)dz2                                           | 21.30    | 21.33    | 21.33    | 12.67        | 13.22        |
| Ni(4)dx2-y2                                        | 3.44     | 3.74     | 4.09     | 17.37        | 18.10        |
| Ni(4)dxy                                           | 18.05    | 17.75    | 17.41    | 1.26         | 0.46         |
| Orbital contributions to the spin densities, $J_6$ |          |          |          |              |              |
|                                                    | <b>1</b> | <b>2</b> | <b>3</b> | <b>4opt.</b> | <b>4exp.</b> |
| Ni(3)dz2                                           | 21.28    | 21.31    | 21.31    | 15.34        | 15.82        |
| Ni(3)dx2-y2                                        | 3.42     | 3.73     | 4.08     | 19.16        | 18.74        |
| Ni(3)dxy                                           | 18.10    | 17.80    | 17.46    | 0.24         | 0.63         |
| Ni(4)dz2                                           | 21.28    | 21.31    | 21.31    | 12.66        | 13.22        |
| Ni(4)dx2-y2                                        | 3.42     | 3.73     | 4.07     | 17.35        | 18.10        |
| Ni(4)dxy                                           | 18.10    | 17.80    | 17.46    | 1.26         | 0.46         |

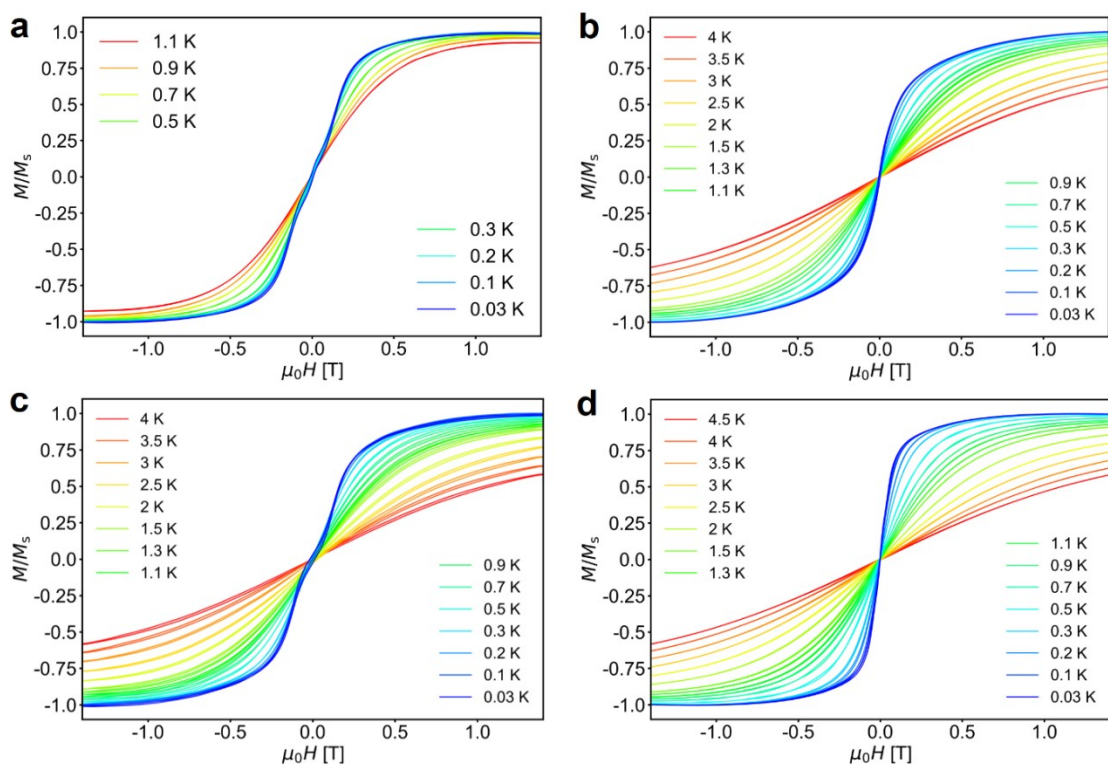

**Figure S3.**  $M(H)$  loops for a micron-sized single crystal of complexes (a) 1; (b) 2; (c) 3 and (d) 4, measured by  $\mu$ -SQUID at a field sweep rate = 8 mT/s and different bath temperatures.

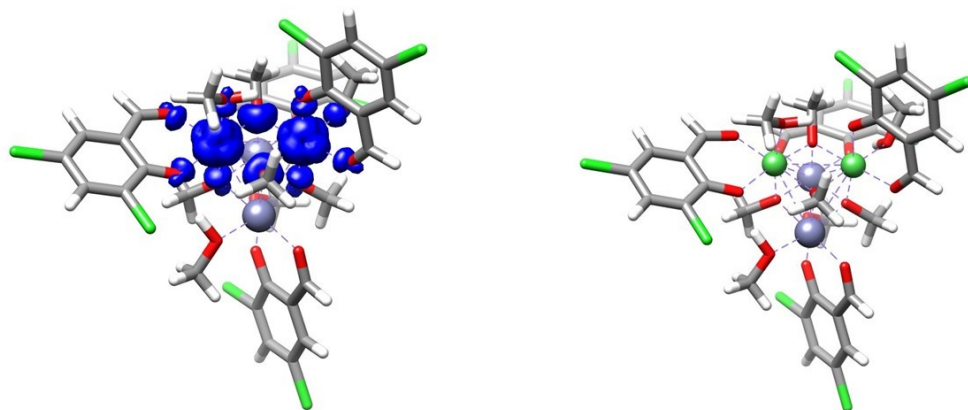

**Figure S4.** Graphical representation of the spin density (contour 0.004 e Å<sup>-3</sup>) at the ground-state (high-spin) configuration (left) and theoretical model used (right) of compound **1**, J<sub>2</sub>.

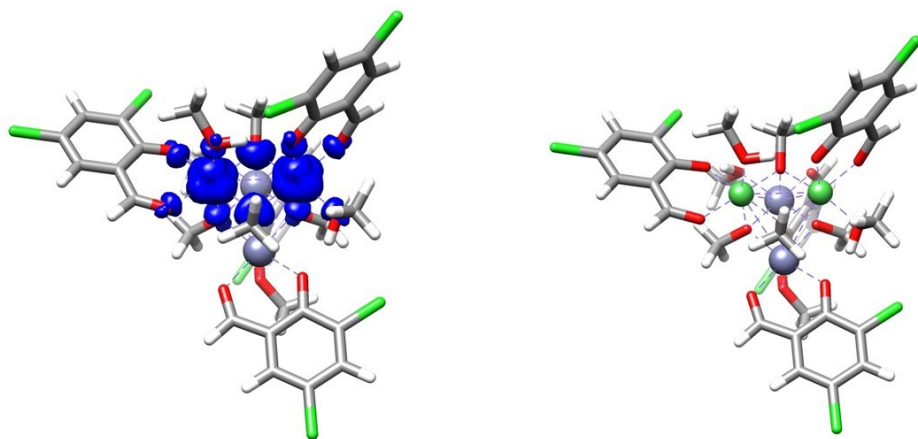

**Figure S5.** Graphical representation of the spin density (contour 0.004 e Å<sup>-3</sup>) at the ground-state (high-spin) configuration (left) and theoretical model used (right) of compound **1**, J<sub>3</sub>.

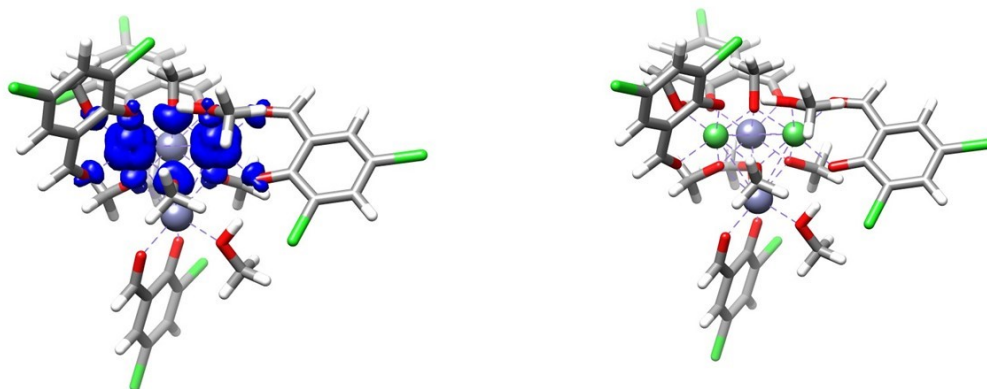

**Figure S6.** Graphical representation of the spin density (contour 0.004 e Å<sup>-3</sup>) at the ground-state (high-spin) configuration (left) and theoretical model used (right) of compound **1**,  $J_4$ .

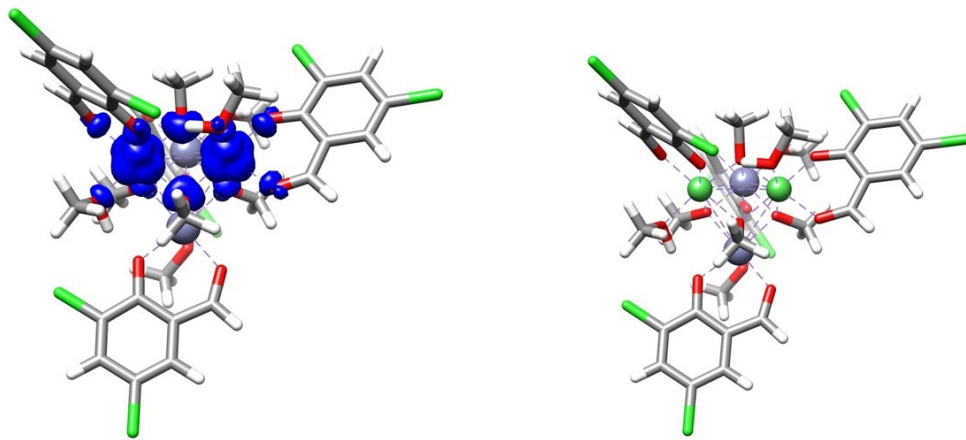

**Figure S7.** Graphical representation of the spin density (contour 0.004 e Å<sup>-3</sup>) at the ground-state (high-spin) configuration (left) and theoretical model used (right) of compound **1**,  $J_5$ .

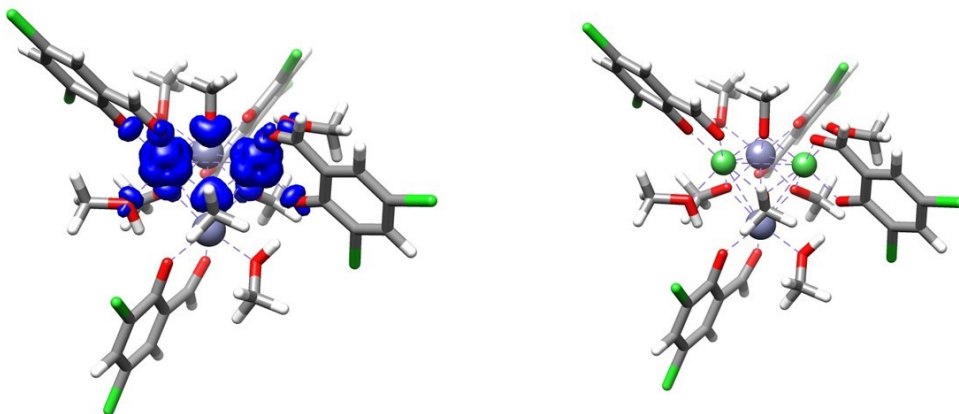

**Figure S8.** Graphical representation of the spin density (contour 0.004 e Å<sup>-3</sup>) at the ground-state (high-spin) configuration (left) and theoretical model used (right) of compound **1**,  $J_6$ .
